1        **Associations between vitamin D and disease risk may be attributed to**  
2        **the confounding influence of adiposity during childhood and adulthood:**  
3        **a lifecourse Mendelian randomization study**

4

5                                Tom G Richardson<sup>1,2\*</sup>, Grace M Power<sup>1</sup>, George Davey Smith<sup>1</sup>

6

7        <sup>1</sup> *MRC Integrative Epidemiology Unit (IEU), Population Health Sciences, Bristol Medical School, University of*  
8        *Bristol, Oakfield House, Oakfield Grove, Bristol, BS8 2BN, United Kingdom*

9        <sup>2</sup> *Novo Nordisk Research Centre, Headington, Oxford, OX3 7FZ, United Kingdom*

10

11        **Running title:** Time-varying effects of adiposity on vitamin D levels

12

13        **Keywords:** Mendelian randomization, Lifecourse epidemiology, Childhood adiposity,  
14        Vitamin D, ALSPAC

15

16        **Word count:** 1,078

17

18        **Total number of figures and tables:** 1

19

## 20 **Abstract**

21 **Background:** Vitamin D supplements are widely prescribed to help reduce disease risk.  
22 However, this strategy is based on findings using conventional epidemiological methods  
23 which are prone to confounding and reverse causation.

24 **Methods:** In this short report, we leveraged genetic variants which differentially influence  
25 body size during childhood and adulthood within a multivariable Mendelian randomization  
26 (MR) framework, allowing us to separate the genetically predicted effects of adiposity at  
27 these two timepoints in the lifecourse.

28 **Results:** Using data from the Avon Longitudinal Study of Parents and Children (ALSPAC),  
29 there was strong evidence that higher childhood body size has a direct effect on lower  
30 vitamin D levels in early life (mean age: 9.9 years, range=8.9 to 11.5 years) after accounting  
31 for the effect of the adult body size genetic score (Beta=-0.32, 95% CI=-0.54 to -0.10,  
32 P=0.004). Conversely, we found evidence that the effect of childhood body size on vitamin  
33 D levels in midlife (mean age: 56.5 years, range=40 to 69 years) is putatively mediated  
34 along the causal pathway involving adulthood adiposity (Beta=-0.17, 95% CI=-0.21 to -0.13,  
35 P=4.6x10<sup>-17</sup>).

36 **Conclusions:** Our findings have important clinical implications in terms of the causal  
37 influence of vitamin D deficiency on disease risk. Furthermore, they serve as a compelling  
38 proof of concept that the timepoints across the lifecourse at which exposures and outcomes  
39 are measured can meaningfully impact overall conclusions drawn by MR studies.

40 **Funding:** This work was supported by the Integrative Epidemiology Unit which receives  
41 funding from the UK Medical Research Council and the University of Bristol  
42 (MC\_UU\_00011/1).

43

## 44 Introduction

45 Associations between vitamin D deficiency and disease risk have been widely reported by  
46 conventional epidemiological studies, including diseases which typically have a late-onset  
47 over the lifecourse, such as coronary artery disease, but also those which may be diagnosed  
48 in early life such as type 1 diabetes (T1D). As a result, vitamin D supplements are widely  
49 prescribed with an estimated 18% of adults in the USA reportedly taking supplements daily  
50 (Rooney *et al.*, 2017). However, there is increasing evidence from the literature suggesting  
51 that vitamin D supplements may be ineffective at reducing disease risk in the population  
52 (Murai *et al.*, 2021), and although there are notable exceptions (e.g. multiple sclerosis  
53 (Mokry *et al.*, 2015, Vandeborgh *et al.*, 2022)), this raises uncertainty into the causal effects  
54 of vitamin D levels on many disease outcomes. Furthermore, these conventional  
55 associational studies may have been susceptible to bias, given that vitamin D levels are  
56 known to differ amongst individuals based on various lifestyle factors, including their body  
57 mass index (BMI), as well as being prone to reverse causation, for example due to  
58 inflammatory processes which are known to lower vitamin D levels (Preiss and Sattar,  
59 2019).

60  
61 An approach to mitigate the influence of these sources of bias is Mendelian randomization  
62 (MR), a causal inference technique which exploits the random allocation of genetic variants  
63 at birth to evaluate the genetically predicted effects of modifiable exposures on disease  
64 outcomes and circulating biomarkers (Davey Smith and Ebrahim, 2003, Richmond and  
65 Davey Smith, 2022). For example, MR has been applied in recent years to suggest that  
66 vitamin D supplements are unlikely to have a beneficial effect on risk of type 1 diabetes  
67 (Manousaki *et al.*, 2021). We previously extended the application of MR to investigate  
68 epidemiological hypotheses in lifecourse setting (known to as 'lifecourse MR'), by deriving  
69 sets of genetic variants to separate the independent effects of body size during childhood  
70 and adulthood within a multivariable framework (Richardson *et al.*, 2020). Applying this  
71 approach has highlighted the putative causal role that early life adiposity may have on  
72 outcomes such as T1D risk (Richardson *et al.*, 2022) and cardiac structure (O'Nunain *et al.*  
73 (in press)). In contrast, we have demonstrated that it's influence on other disease outcomes

74 (e.g. cardiovascular disease (Power *et al.*, 2021)) is likely attributed to the long-term  
75 consequence of remaining overweight into later life. Whilst these applications serve as  
76 powerful examples of lifecourse MR as an approach to separate the effects of the same  
77 exposure based on data derived from early and later life, it has yet to be applied to the  
78 same outcome when measured at different timepoints in the lifecourse.

79

## 80 **Results**

81 In this study, we applied lifecourse MR to investigate the independent effects of childhood  
82 and adult body size has a largely indirect influence on 25-hydroxyvitamin D (25OHD) levels  
83 measured during childhood (mean age: 9.9 years, range=8.9 to 11.5 years) using  
84 individual-level data from the Avon Longitudinal Study of Parents and Children (ALSPAC)  
85 (Boyd *et al.*, 2013, Fraser *et al.*, 2013) and during adulthood (mean age: 56.5 years,  
86 range=40 to 69 years) using summary-level data based on individuals from the UK Biobank  
87 (UKB) study (Manousaki *et al.*, 2020). Firstly, using data derived from the ALSPAC study,  
88 our analyses indicated that childhood body size directly influences vitamin D levels during  
89 childhood after accounting for the adult body size genetic instrument in our model (Beta=-  
90 0.32 standard deviation (SD) change in natural log-transformed 25OHD per change in body  
91 size category, 95% CI=-0.54 to -0.10, P=0.004) (**Figure 1A & Figure 1B**). Using data from  
92 the UKB study, evidence of an effect of higher childhood body size on adulthood measured  
93 25OHD levels (Beta=-0.14, 95% CI=-0.10 to -0.03, P=2.4x10<sup>-4</sup>) attenuated in a multivariate  
94 setting upon accounting for adulthood body size (Beta=0.04, 95% CI=-0.01 to 0.08, P=0.10).  
95 In contrast, strong evidence of an effect for higher adult body size on lower 25OHD levels  
96 measured in adulthood was found in the multivariable model (Beta=-0.17, 95% CI=-0.21 to  
97 -0.13, P=4.6x10<sup>-17</sup>) (**Figure 1C**). This suggests that childhood body size has an indirect  
98 influence of 25OHD levels in adulthood, likely due to its persistent effect throughout the  
99 lifecourse (**Figure 1D**).

100

101 **Figure 1**

102

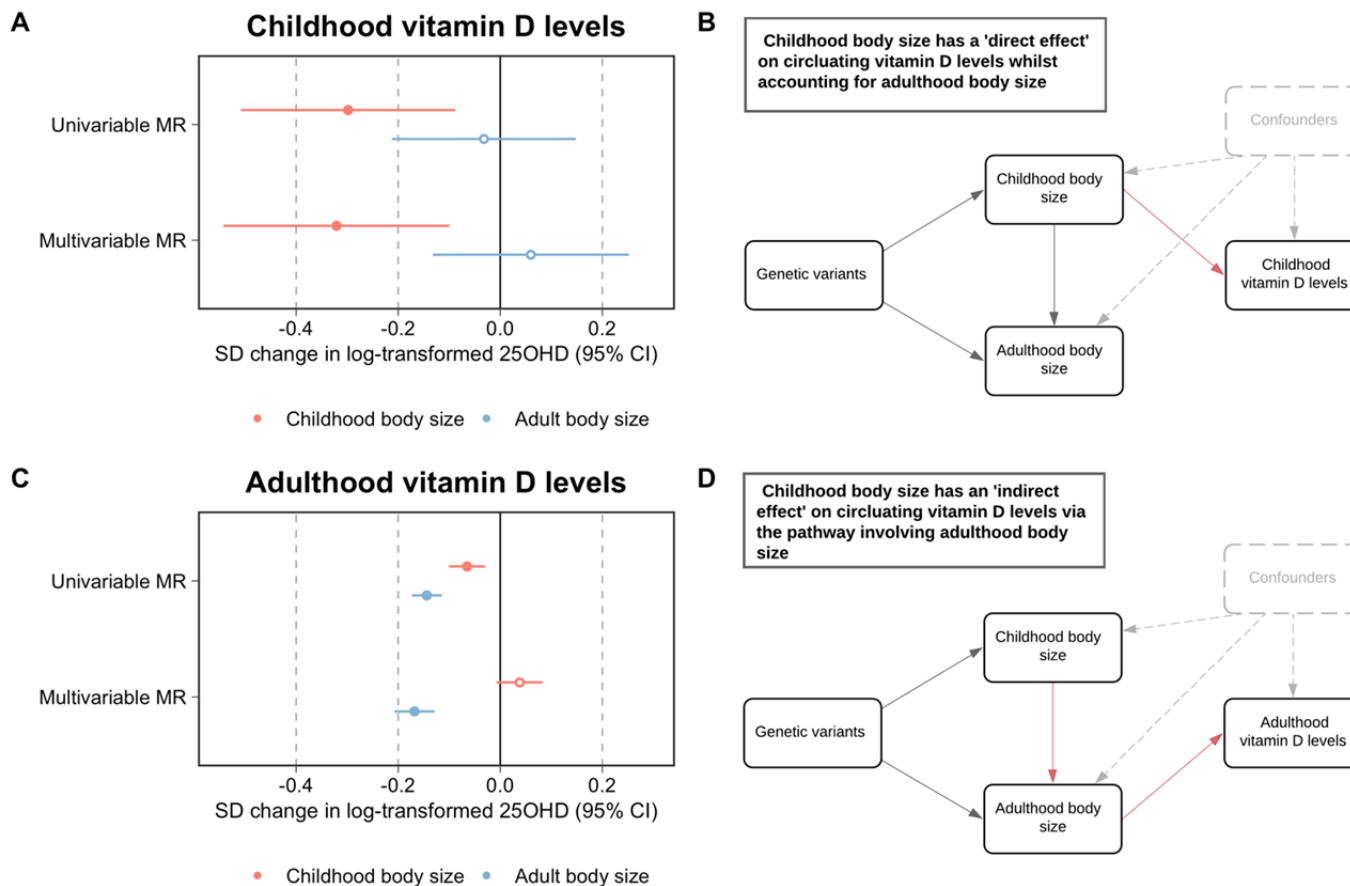

103

104 *A) A forest plot illustrating the direct effect of childhood body size on circulating vitamin D levels measured during childhood*  
 105 *(mean age: 9.9 years) using participant data from the Avon Longitudinal Study of Parents and Children (ALSPAC) with the*  
 106 *corresponding schematic diagram for this finding being located in panel B). C) A forest plot depicting the indirect effect of*  
 107 *childhood body size on adulthood measured vitamin D levels using data from the UK Biobank study (mean age: X years) as*  
 108 *described in the schematic diagram presented in panel D). MR – Mendelian randomization.*

109

## 110 Discussion

111 Our findings suggest that increased adiposity exerts a strong effect on lower vitamin D  
112 levels during both childhood and adulthood. Separating causal from confounding factors,  
113 particularly in a lifecourse setting, would have been extremely challenging to disentangle  
114 without the use of genetic variants as achieved in this study. In contrast, appropriately  
115 accounting for confounding factors in an conventional epidemiological setting is  
116 notoriously challenging, with previous studies reporting evidence of association between  
117 vitamin D and T1D in early life even after adjusting for factors such as birthweight  
118 (Hypponen *et al.*, 2001). Taken together with evidence from previous MR studies, which  
119 have found that childhood body size (Richardson *et al.*, 2022), but not vitamin D levels  
120 (Manousaki *et al.*, 2021), increases risk of T1D, our results suggest that adiposity may have  
121 acted as a confounding factor on the observed association between vitamin D and T1D.  
122 These findings therefore have important clinical implications in terms of whether patients  
123 newly diagnosed with T1D should be prescribed vitamin D supplements or not.

124

125 Effect estimates derived from MR studies are conventionally interpreted as 'lifelong effects'  
126 given that the germline genetic variants harnessed by this approach as instrumental  
127 variables are typically fixed at conception. The results of this study serve as a compelling  
128 demonstration that the timepoint at which both exposures and outcomes are measured  
129 across the lifecourse can meaningfully impact conclusions drawn by MR investigations.  
130 Whilst the childhood and adult body size genetic scores were used in this study as a proof  
131 of concept, our findings also help to further validate their utility in separating the temporal  
132 effects of adiposity within a lifecourse MR framework. Overall, these findings emphasise  
133 the importance of future MR studies taking further consideration into the age of  
134 participants that their genetic estimates are based on, as well as the age at which cases are  
135 diagnosed for disease outcome estimates, before interpreting and drawing conclusions  
136 from their findings. Furthermore, our results highlight the importance of conducting  
137 genome-wide association studies on populations of different age groups to help uncover  
138 time-varying genetic effects scattered throughout the human genome. Findings from these  
139 endeavours should facilitate insight into the direct and indirect effects of modifiable early

140 life exposures using approaches such as lifecourse MR. This may help to elucidate the  
141 critical timepoints whereby conferred risk by these exposures on disease outcomes starts  
142 to become immutable, which has important implications for improving patient care in a  
143 clinical setting.

## 144 **Materials and Methods**

145 ALSPAC is a population-based cohort investigating genetic and environmental factors that  
146 affect the health and development of children. The study methods are described in detail  
147 elsewhere (Boyd *et al.*, 2013, Fraser *et al.*, 2013). In brief, 14,541 pregnant women  
148 residents in the former region of Avon, UK, with an expected delivery date between April 1,  
149 1991 and December 31, 1992, were eligible to take part in ALSPAC. Detailed phenotypic  
150 information, biological samples and genetic data which have been collected from the  
151 ALSPAC participants are available through a searchable data dictionary ([http://  
152 www.bris.ac.uk/alspac/researchers/our-data/](http://www.bris.ac.uk/alspac/researchers/our-data/)). Written informed consent was obtained  
153 for all study participants. Ethical approval for this study was obtained from the ALSPAC  
154 Ethics and Law Committee and the Local Research Ethics Committees. Measures of 25-  
155 hydroxyvitamin D (25OHD) levels were obtained from non-fasting blood samples taken  
156 from ALSPAC participants at mean age 9.9 years (range=8.9 to 11.5 years) which were log  
157 transformed to ensure normality.

158  
159 Derivation of genetic instruments for childhood and adulthood body size have been  
160 described in detail previously (Richardson *et al.*, 2020). In brief, genome-wide association  
161 studies (GWAS) were conducted on 463,005 UK Biobank (UKB) participants (mean age:  
162 56.5 years, range=40 to 69 years) who had both reported their body size at age 10 as well  
163 as had their BMI clinically measured. Genetic instruments were identified from these  
164 analyses (based on  $P < 5 \times 10^{-8}$ ) and the resulting genetic score for childhood body size has  
165 been validated using measured childhood BMI in ALSPAC (Richardson *et al.*, 2020), the  
166 Young Finns Study (Richardson *et al.*, 2021) and the Trøndelag Health (HUNT) study  
167 (Brandkvist *et al.*, 2020). Genetic estimates on adulthood 25OHD were obtained from a  
168 previously conducted GWAS in UKB (Manousaki *et al.*, 2020). Despite having overlapping  
169 samples when analysing our body size instruments against the adulthood measure of

170 vitamin D, there was little evidence of inflated type 1 error rates (based on the calculator at  
171 <https://sb452.shinyapps.io/overlap>) (Burgess *et al.*, 2016).

172  
173 Mendelian randomization (MR) analyses to estimate genetically predicted effects on  
174 childhood 25OHD were conducted in a one-sample setting using individual level data from  
175 ALSPAC after generating genetic risk scores for our body size instruments with adjustment  
176 for age and sex. MR analyses to estimate effects on adulthood 25OHD were undertaken in a  
177 two-sample setting using the inverse variance weighted (IVW) method (Burgess *et al.*,  
178 2013), as this allowed us to additionally perform analyses using the weighted median and  
179 MR-Egger methods (Bowden *et al.*, 2015, Bowden *et al.*, 2016). (**Supplementary Table 1**).  
180 Multivariable MR were performed in one- and two-sample settings respectively for  
181 childhood and adulthood measures of 25OHD (Sanderson *et al.*, 2019) (**Supplementary**  
182 **Table 2**).

183



## 184 **Data availability**

185 All individual level data analysed in this study can be accessed via an approved application  
186 to ALSPAC (<http://www.bristol.ac.uk/alspac/researchers/access/>). Summary-level data on  
187 adulthood vitamin D levels can be accessed publicly via the OpenGWAS  
188 (<https://gwas.mrcieu.ac.uk/>).

## 189 **Consent**

190 Written informed consent was obtained for all study participants. Ethical approval for this  
191 study was obtained from the ALSPAC Ethics and Law Committee and the Local Research  
192 Ethics Committees.

## 193 **Competing Interests**

194 TGR is employed part-time by Novo Nordisk outside of this work. All other authors declare  
195 no conflicts of interest.

## 196 **Funding**

197 This work was supported by the Integrative Epidemiology Unit which receives funding  
198 from the UK Medical Research Council and the University of Bristol (MC\_UU\_00011/1).

## 199 **Acknowledgements**

200 We are extremely grateful to all the families who took part in this study, the midwives for  
201 their help in recruiting them and the whole ALSPAC team, which includes interviewers,  
202 computer and laboratory technicians, clerical workers, research scientists, volunteers,  
203 managers, receptionists and nurses. The UK Medical Research Council and Wellcome  
204 (Grant ref: 217065/Z/19/Z) and the University of Bristol provide core support for ALSPAC.  
205 Consent for biological samples has been collected in accordance with the Human Tissue Act  
206 (2004). GWAS data was generated by Sample Logistics and Genotyping Facilities at  
207 Wellcome Sanger Institute and LabCorp (Laboratory Corporation of America) using  
208 support from 23andMe.

209

210 This research was conducted at the NIHR Biomedical Research Centre at the University  
211 Hospitals Bristol NHS Foundation Trust and the University of Bristol. The views expressed  
212 in this publication are those of the author(s) and not necessarily those of the NHS, the  
213 National Institute for Health Research or the Department of Health. This publication is the  
214 work of the authors and TGR will serve as guarantor for the contents of this paper.

## 215 **References**

- 216 Bowden, J., Davey Smith, G. & Burgess, S. 2015. Mendelian randomization with invalid  
217 instruments: effect estimation and bias detection through Egger regression. *Int J Epidemiol*, 44,  
218 512-25.
- 219 Bowden, J., Davey Smith, G., Haycock, P. C. & Burgess, S. 2016. Consistent Estimation in  
220 Mendelian Randomization with Some Invalid Instruments Using a Weighted Median Estimator.  
221 *Genet Epidemiol*, 40, 304-14.
- 222 Boyd, A., Golding, J., Macleod, J., Lawlor, D. A., Fraser, A., Henderson, J., Molloy, L., Ness,  
223 A., Ring, S. & Davey Smith, G. 2013. Cohort Profile: the 'children of the 90s'--the index  
224 offspring of the Avon Longitudinal Study of Parents and Children. *Int J Epidemiol*, 42, 111-27.
- 225 Brandkvist, M., Bjorngaard, J. H., Odegard, R. A., Asvold, B. O., Smith, G. D., Brumpton, B.,  
226 Hveem, K., Richardson, T. G. & Vie, G. A. 2020. Separating the genetics of childhood and adult  
227 obesity: a validation study of genetic scores for body mass index in adolescence and adulthood in  
228 the HUNT Study. *Hum Mol Genet*.
- 229 Burgess, S., Butterworth, A. & Thompson, S. G. 2013. Mendelian randomization analysis with  
230 multiple genetic variants using summarized data. *Genet Epidemiol*, 37, 658-65.
- 231 Burgess, S., Davies, N. M. & Thompson, S. G. 2016. Bias due to participant overlap in two-  
232 sample Mendelian randomization. *Genet Epidemiol*, 40, 597-608.
- 233 Davey Smith, G. & Ebrahim, S. 2003. 'Mendelian randomization': can genetic epidemiology  
234 contribute to understanding environmental determinants of disease? *Int J Epidemiol*, 32, 1-22.
- 235 Fraser, A., Macdonald-Wallis, C., Tilling, K., Boyd, A., Golding, J., Davey Smith, G.,  
236 Henderson, J., Macleod, J., Molloy, L., Ness, A., Ring, S., Nelson, S. M. & Lawlor, D. A. 2013.  
237 Cohort Profile: the Avon Longitudinal Study of Parents and Children: ALSPAC mothers cohort.  
238 *Int J Epidemiol*, 42, 97-110.
- 239 Hypponen, E., Laara, E., Reunanen, A., Jarvelin, M. R. & Virtanen, S. M. 2001. Intake of  
240 vitamin D and risk of type 1 diabetes: a birth-cohort study. *Lancet*, 358, 1500-3.
- 241 Manousaki, D., Harroud, A., Mitchell, R. E., Ross, S., Forgetta, V., Timpson, N. J., Smith, G. D.,  
242 Polychronakos, C. & Richards, J. B. 2021. Vitamin D levels and risk of type 1 diabetes: A  
243 Mendelian randomization study. *PLoS Med*, 18, e1003536.
- 244 Manousaki, D., Mitchell, R., Dudding, T., Haworth, S., Harroud, A., Forgetta, V., Shah, R. L.,  
245 Luan, J., Langenberg, C., Timpson, N. J. & Richards, J. B. 2020. Genome-wide Association  
246 Study for Vitamin D Levels Reveals 69 Independent Loci. *Am J Hum Genet*, 106, 327-337.
- 247 Mokry, L. E., Ross, S., Ahmad, O. S., Forgetta, V., Smith, G. D., Goltzman, D., Leong, A.,  
248 Greenwood, C. M., Thanassoulis, G. & Richards, J. B. 2015. Vitamin D and Risk of Multiple  
249 Sclerosis: A Mendelian Randomization Study. *PLoS Med*, 12, e1001866.
- 250 Murai, I. H., Fernandes, A. L., Sales, L. P., Pinto, A. J., Goessler, K. F., Duran, C. S. C., Silva,  
251 C. B. R., Franco, A. S., Macedo, M. B., Dalmolin, H. H. H., Baggio, J., Balbi, G. G. M., Reis, B.

252 Z., Antonangelo, L., Caparbo, V. F., Gualano, B. & Pereira, R. M. R. 2021. Effect of a Single  
253 High Dose of Vitamin D3 on Hospital Length of Stay in Patients With Moderate to Severe  
254 COVID-19: A Randomized Clinical Trial. *JAMA*, 325, 1053-1060.

255 Power, G. M., Tyrrell, J., Frayling, T. M., Davey Smith, G. & Richardson, T. G. 2021.  
256 Mendelian Randomization Analyses Suggest Childhood Body Size Indirectly Influences End  
257 Points From Across the Cardiovascular Disease Spectrum Through Adult Body Size. *J Am Heart*  
258 *Assoc*, 10, e021503.

259 Preiss, D. & Sattar, N. 2019. Research digest: vitamin D supplementation. *Lancet Diabetes*  
260 *Endocrinol*, 7, 91.

261 Richardson, T. G., Crouch, D. J. M., Power, G. M., Berstein, F. M., Hazelwood, E., Fang, S.,  
262 Cho, Y., Inshaw, J. R. J., Robertson, C. C., Sidore, C., Cucca, F., Rich, S. S., Todd, J. A. &  
263 Smith, G. D. 2022. Childhood body size directly increases type 1 diabetes risk based on a  
264 lifecourse Mendelian randomization approach. *Nat Commun (in press)*.

265 Richardson, T. G., Mykkanen, J., Pahkala, K., Ala-Korpela, M., Bell, J. A., Taylor, K., Viikari,  
266 J., Lehtimäki, T., Raitakari, O. & Davey Smith, G. 2021. Evaluating the direct effects of  
267 childhood adiposity on adult systemic metabolism: a multivariable Mendelian randomization  
268 analysis. *Int J Epidemiol*.

269 Richardson, T. G., Sanderson, E., Elsworth, B., Tilling, K. & Davey Smith, G. 2020. Use of  
270 genetic variation to separate the effects of early and later life adiposity on disease risk:  
271 mendelian randomisation study. *BMJ*, 369, m1203.

272 Richmond, R. C. & Davey Smith, G. 2022. Mendelian Randomization: Concepts and Scope.  
273 *Cold Spring Harb Perspect Med*, 12.

274 Rooney, M. R., Harnack, L., Michos, E. D., Ogilvie, R. P., Sempos, C. T. & Lutsey, P. L. 2017.  
275 Trends in Use of High-Dose Vitamin D Supplements Exceeding 1000 or 4000 International  
276 Units Daily, 1999-2014. *JAMA*, 317, 2448-2450.

277 Sanderson, E., Davey Smith, G., Windmeijer, F. & Bowden, J. 2019. An examination of  
278 multivariable Mendelian randomization in the single-sample and two-sample summary data  
279 settings. *Int J Epidemiol*, 48, 713-727.

280 Vandebergh, M., Degryse, N., Dubois, B. & Goris, A. 2022. Environmental risk factors in  
281 multiple sclerosis: bridging Mendelian randomization and observational studies. *J Neurol*.  
282  
283
